# Supplementary material
Source: publisher site journal article supplement (https://mbmg.pensoft.net/article/download/suppl/4027106/)
Supplement: Supplementary file 1

Analysis of individual diet diversity of Merino and Dorper samples, at species and family level.

Carried out in R v 3.3.3. Levene’s test uses the package ‘car’, John Fox and Sanford Weisberg (2011). An {R} Companion to Applied Regression, Second Edition. Thousand Oaks CA: Sage. URL: http://socserv.socsci.mcmaster.ca/jfox/Books/Companion

SPECIES LEVEL

Shapiro-Wilk test for normality (in R v3.3.3)

Dorper: W = 0.99224, p-value = 0.9978

Merino: W = 0.92597, p-value = 0.444

Levene's Test for Homogeneity of Variance (center = median)

Df F value Pr(>F)

group 1 0.3499 0.563

Residual 15

Levene’s test conducted using R package ‘car’ v 2.1-6.

FAMILY LEVEL

Shapiro-Wilk test for normality (in R v3.3.3)

Dorper: W = 0.98724, p-value = 0.9896

Merino: W = 0.87032, p-value = 0.1239

Levene's Test for Homogeneity of Variance (center = median)

Df F value Pr(>F)

group 1 0.5329 0.4766

Residual 15

Levene’s test conducted using R package ‘car’ v 2.1-6.
